# Supplementary material for: Generation of Nonhuman Primate Model of Cone Dysfunction through In Situ AAV-Mediated CNGB3 Ablation
Source: PubMed Central journal article supplement (PMC7479327; doi:10.1016/j.omtm.2020.08.007), 2020-08-08
Supplement: mmc1.pdf [file mmc1.pdf]

OMTM, Volume 18

## Supplemental Information

### Generation of Nonhuman Primate Model of Cone Dysfunction through *In Situ* AAV-Mediated *CNGB3* Ablation

Qiang Lin, Ji-Neng Lv, Kun-Chao Wu, Chang-Jun Zhang, Qin Liu, and Zi-Bing Jin

## Supplemental figures

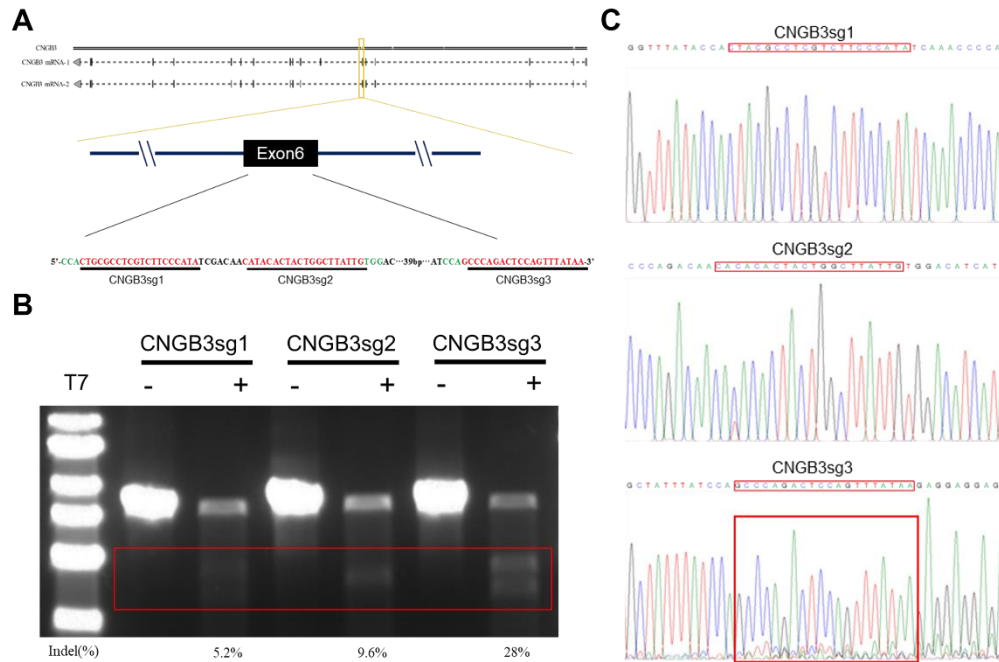

**Figure S1. CRISPR-Cas9 targets the *CNGB3* locus in Cos7 cells.** (A) Schematic illustration of the *CNGB3* locus and the location of guides employing SpCas9 (red sequence). (B) Representative gel images showing T7E1 assays for Cas9 and sgRNA-mediated indels. Digested production is highlighted in the red box. The ratios of indels are shown at the bottom. (C) Sanger sequencing of target sites of Cos7 cells transfected with CNGB3sg1, CNGB3sg2 or CNGB3sg3. The red box highlights the indels generated by CNGB3sg3.

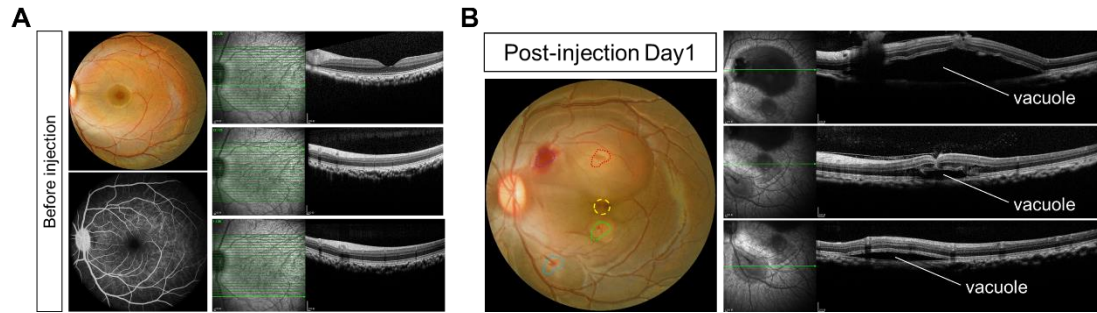

**Figure S2. Representative FP, FFA and OCT images of the left eye showing the structure of the retina before and after AAV injection.** (A) Representative FP, FFA and OCT images of the left eye before injection. (B) Representative FP and OCT monitoring of the puncture sites and AAV vacuoles on the injection day signed as Day 1. There are four punctures in the left eye that are indicated by colored polygons. The fovea is indicated with a dotted circle in yellow.

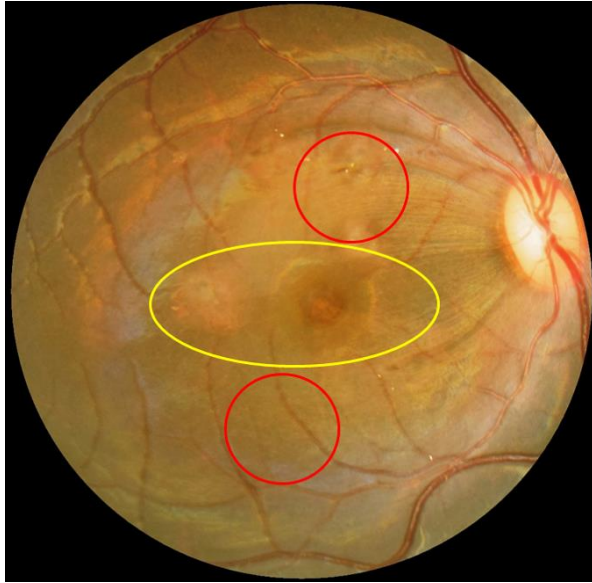

**Figure S3. Schematic of retinal dissection.** The background shows representative FP images, and the circles indicate the approximate sampling region. The circled part shown in yellow contains the fovea that was used to perform immunofluorescence, and the other two circle parts shown in red were used to isolate single cones to perform single-cell RNA sequencing and deep sequencing.

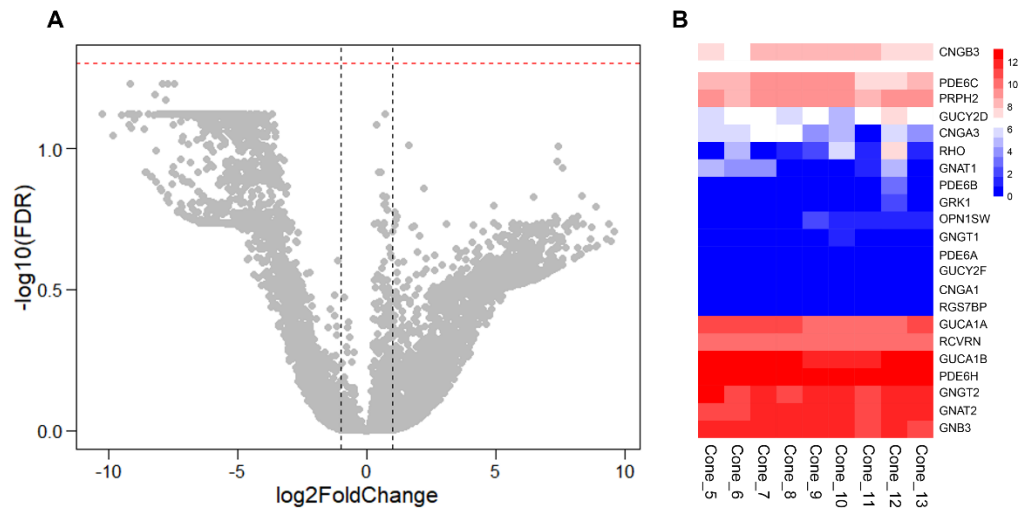

**Figure S4. Differentially expressed genes in single-cell sequencing.** (A) EdgeR was used to compare sgRNA-positive groups except Cone\_6 (8 samples) and control groups (4 samples). As shown in the figure, there were no significant differentially expressed genes. (B) Heatmap of the expression of CNGB3 and its predicted interacting genes. The scale represents  $\log_2(\text{FPKM}+1)$ .

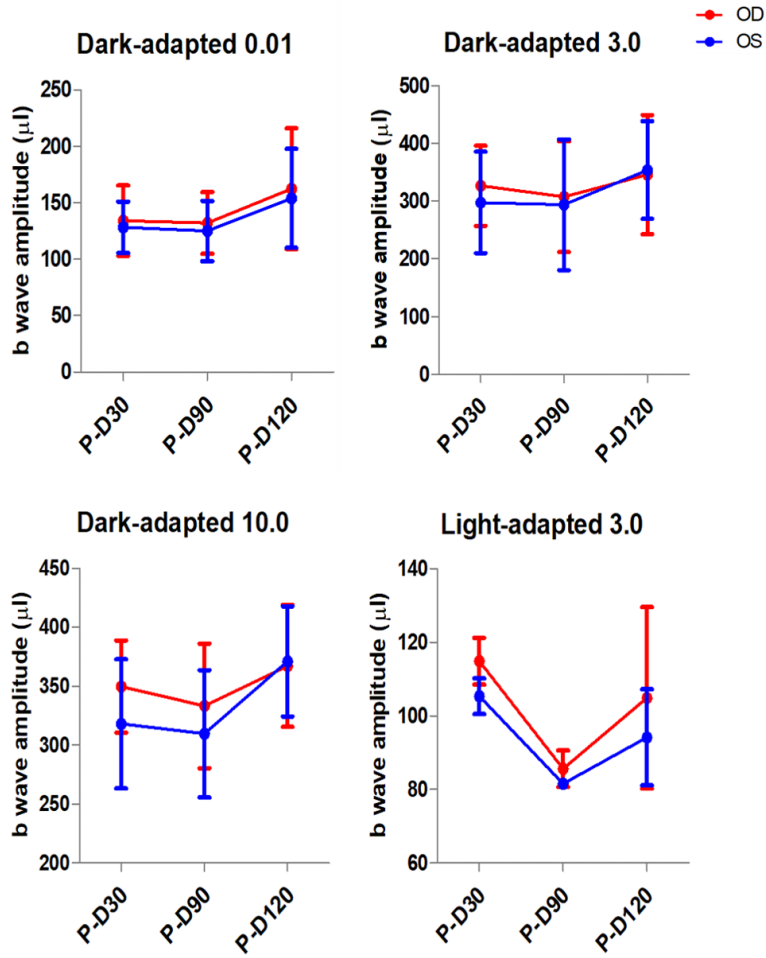

**Figure S5. ERG responses of the NHP model after injection.** There was no significant difference in dark-adapted and light-adapted ERG responses among NHP models. The P value is calculated by t test.

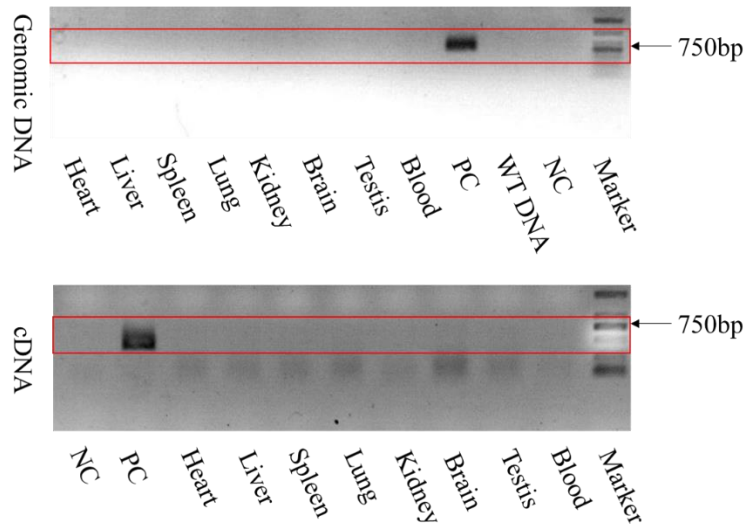

**Figure S6. SpCas9 expression in other tissues.** The upper image shows the electrophoretic analysis of the PCRs of the Cas9 genome in tissues. The lower panel shows the electrophoretic analysis of reverse transcription PCRs of Cas9 transcripts.

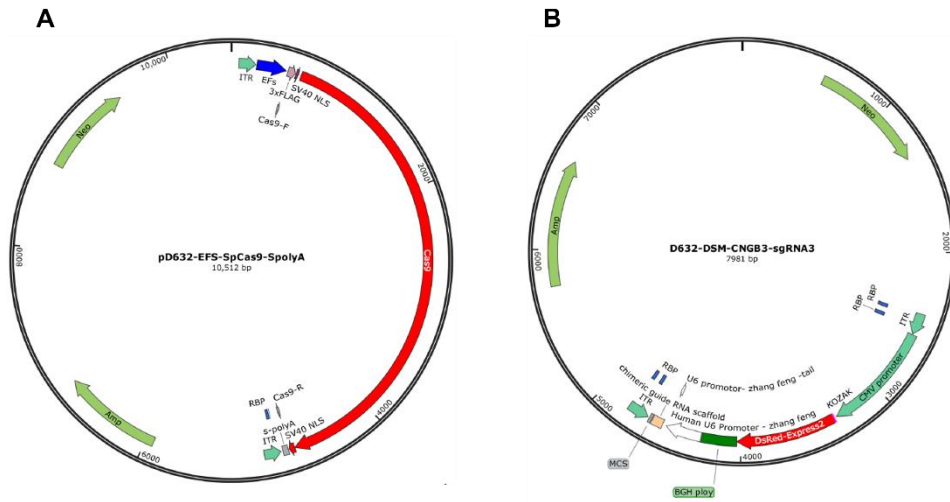

**Figure S7. Maps of the AAV9 vector.** (A) Map of the AAV-EF-SpCas9 vector. (B) Map of the AAV-CNGB3sgRNA3-DsRed vecto



**Supplemental tables**

**Table S1 Information of single cone groups**

|            | Control group |        |        |        | SgRNA-positive group |        |        |        |        |         |         |         |         |
|------------|---------------|--------|--------|--------|----------------------|--------|--------|--------|--------|---------|---------|---------|---------|
| Group      | Cone_1        | Cone_2 | Cone_3 | Cone_4 | Cone_5               | Cone_6 | Cone_7 | Cone_8 | Cone_9 | Cone_10 | Cone_11 | Cone_12 | Cone_13 |
| Cell-count | 2             | 3      | 2      | 3      | 1                    | 3      | 2      | 3      | 1      | 1       | 1       | 1       | 1       |

**Table S2 Genes interact with *CNGB3* predicted in STRING**

| #node1        | node2         | node1   | node2   | node1_external_id      | node2_external_id      |
|---------------|---------------|---------|---------|------------------------|------------------------|
| <i>CNGB3</i>  | <i>GNAT2</i>  | 4439069 | 4434167 | 9606.ENSP00000316605   | 9606.ENSP00000251337   |
| <i>CNGB3</i>  | <i>PDE6H</i>  | 4439069 | 4435698 | 9606.ENSP00000316605   | 9606.ENSP00000266395   |
| <i>CNGB3</i>  | <i>PDE6A</i>  | 4439069 | 4434424 | 9606.ENSP00000316605   | 9606.ENSP00000255266   |
| <i>CNGB3</i>  | <i>GUCY2D</i> | 4439069 | 4434390 | 9606.ENSP00000316605   | 9606.ENSP00000254854   |
| <i>CNGB3</i>  | <i>GNAT1</i>  | 4439069 | 4433558 | 9606.ENSP00000316605   | 9606.ENSP00000232461   |
| <i>CNGB3</i>  | <i>GUCY2F</i> | 4439069 | 4433038 | 9606.ENSP00000316605   | 9606.ENSP00000218006   |
| <i>CNGB3</i>  | <i>GNGT1</i>  | 4439069 | 4434061 | 9606.ENSP00000316605   | 9606.ENSP00000248572   |
| <i>CNGB3</i>  | <i>GNB3</i>   | 4439069 | 4433453 | 9606.ENSP00000316605   | 9606.ENSP00000229264   |
| <i>CNGB3</i>  | <i>RHO</i>    | 4439069 | 4437258 | 9606.ENSP00000316605   | 9606.ENSP00000296271   |
| <i>CNGB3</i>  | <i>OPN1SW</i> | 4439069 | 4434096 | 9606.ENSP00000316605   | 9606.ENSP00000249389   |
| <i>CNGB3</i>  | <i>GUCA1B</i> | 4439069 | 4433500 | 9606.ENSP00000316605   | 9606.ENSP00000230361   |
| <i>PDE6C</i>  | <i>CNGB3</i>  | 4443750 | 4439069 | 9606.ENSP00000360502   | 9606.ENSP00000316605   |
| <i>CNGA3</i>  | <i>CNGB3</i>  | 4446157 | 4439069 | 9606.ENSP00000377140   | 9606.ENSP00000316605   |
| <i>PDE6B</i>  | <i>CNGB3</i>  | 4449107 | 4439069 | 9606.ENSP00000420295   | 9606.ENSP00000316605   |
| <i>CNGA1</i>  | <i>CNGB3</i>  | 4447097 | 4439069 | 9606.ENSP00000384264   | 9606.ENSP00000316605   |
| <i>GUCA1A</i> | <i>CNGB3</i>  | 4446247 | 4439069 | 9606.ENSP00000377784   | 9606.ENSP00000316605   |
| <i>GNGT2</i>  | <i>CNGB3</i>  | 4449343 | 4439069 | 9606.ENSP00000426022   | 9606.ENSP00000316605   |
| <i>CNGB3</i>  | <i>PDE6C</i>  | 4328598 | 4321580 | 9544.ENSMUP00000032058 | 9544.ENSMUP00000019304 |
| <i>CNGB3</i>  | <i>RGS7BP</i> | 4328598 | 4326328 | 9544.ENSMUP00000032058 | 9544.ENSMUP00000027816 |
| <i>CNGB3</i>  | <i>RCVRN</i>  | 4328598 | 4324087 | 9544.ENSMUP00000032058 | 9544.ENSMUP00000023775 |
| <i>CNGB3</i>  | <i>CNGA1</i>  | 4328598 | 4315094 | 9544.ENSMUP00000032058 | 9544.ENSMUP00000007610 |
| <i>CNGB3</i>  | <i>GRK1</i>   | 4328598 | 4316303 | 9544.ENSMUP00000032058 | 9544.ENSMUP00000009743 |
| <i>CNGB3</i>  | <i>GNGT2</i>  | 4328598 | 4312643 | 9544.ENSMUP00000032058 | 9544.ENSMUP00000003274 |
| <i>CNGB3</i>  | <i>PRPH2</i>  | 4328598 | 4315021 | 9544.ENSMUP00000032058 | 9544.ENSMUP00000007500 |
